# Supplementary figures and images for: Combinatorial interplay of RNA-binding proteins tunes levels of mitochondrial mRNA in trypanosomes
Source: PubMed Central journal article supplement — RNA. 2018 Nov;24(11):1594–606. doi: 10.1261/rna.066233.118 (PMC6191715; doi:10.1261/rna.066233.118), 2018-11

**A**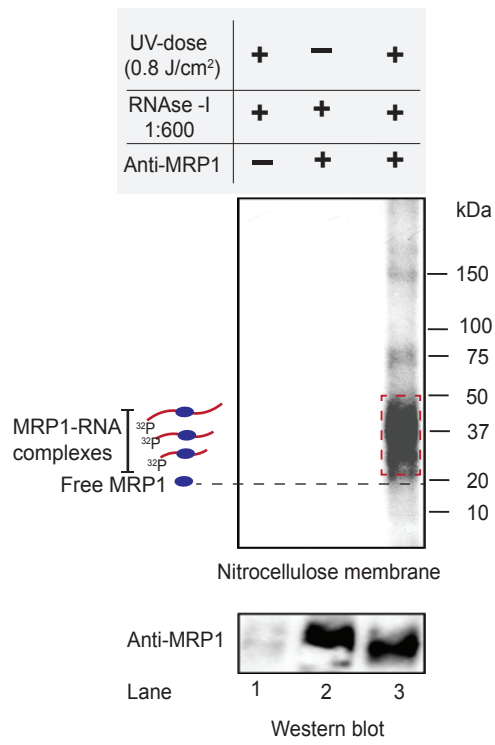**B**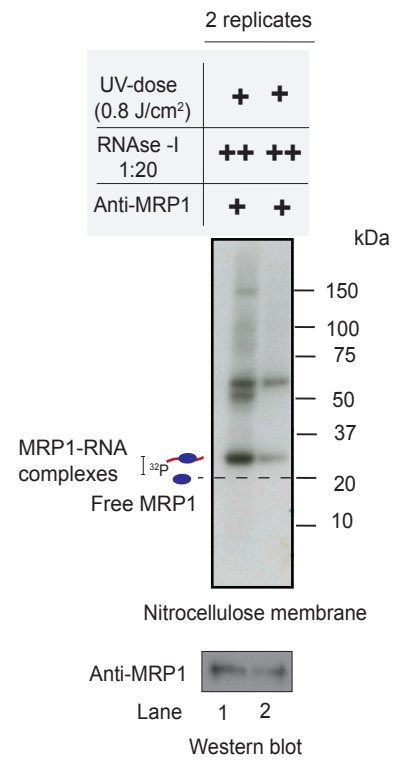**C**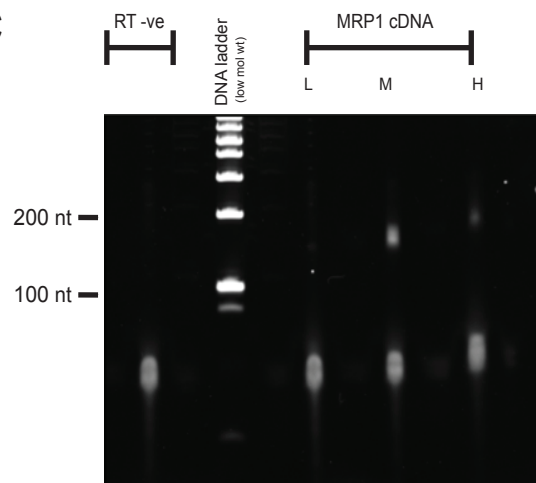**Figure S1.**

**A**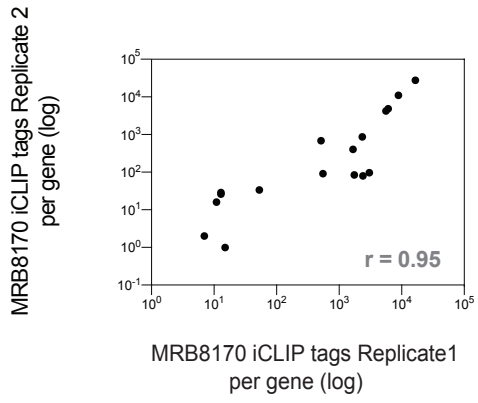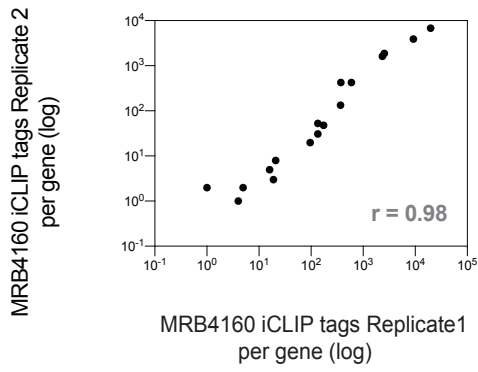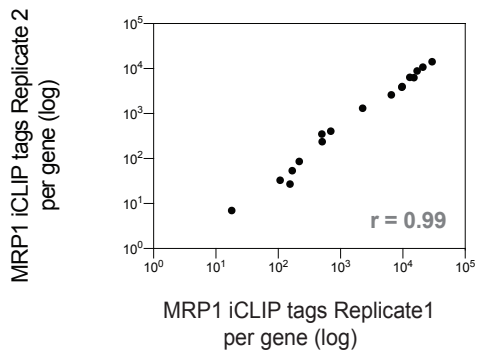**B**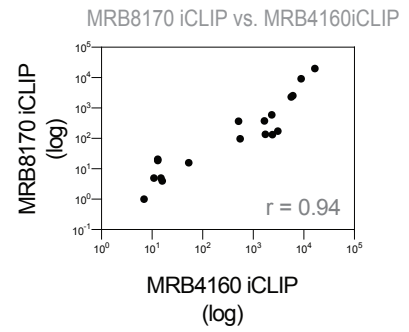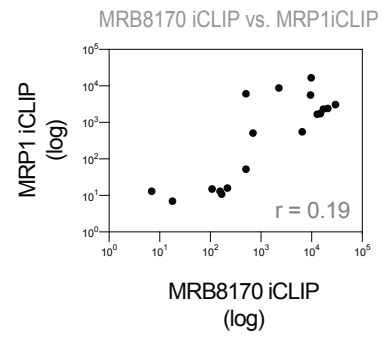**Figure S2.**

pre-edited

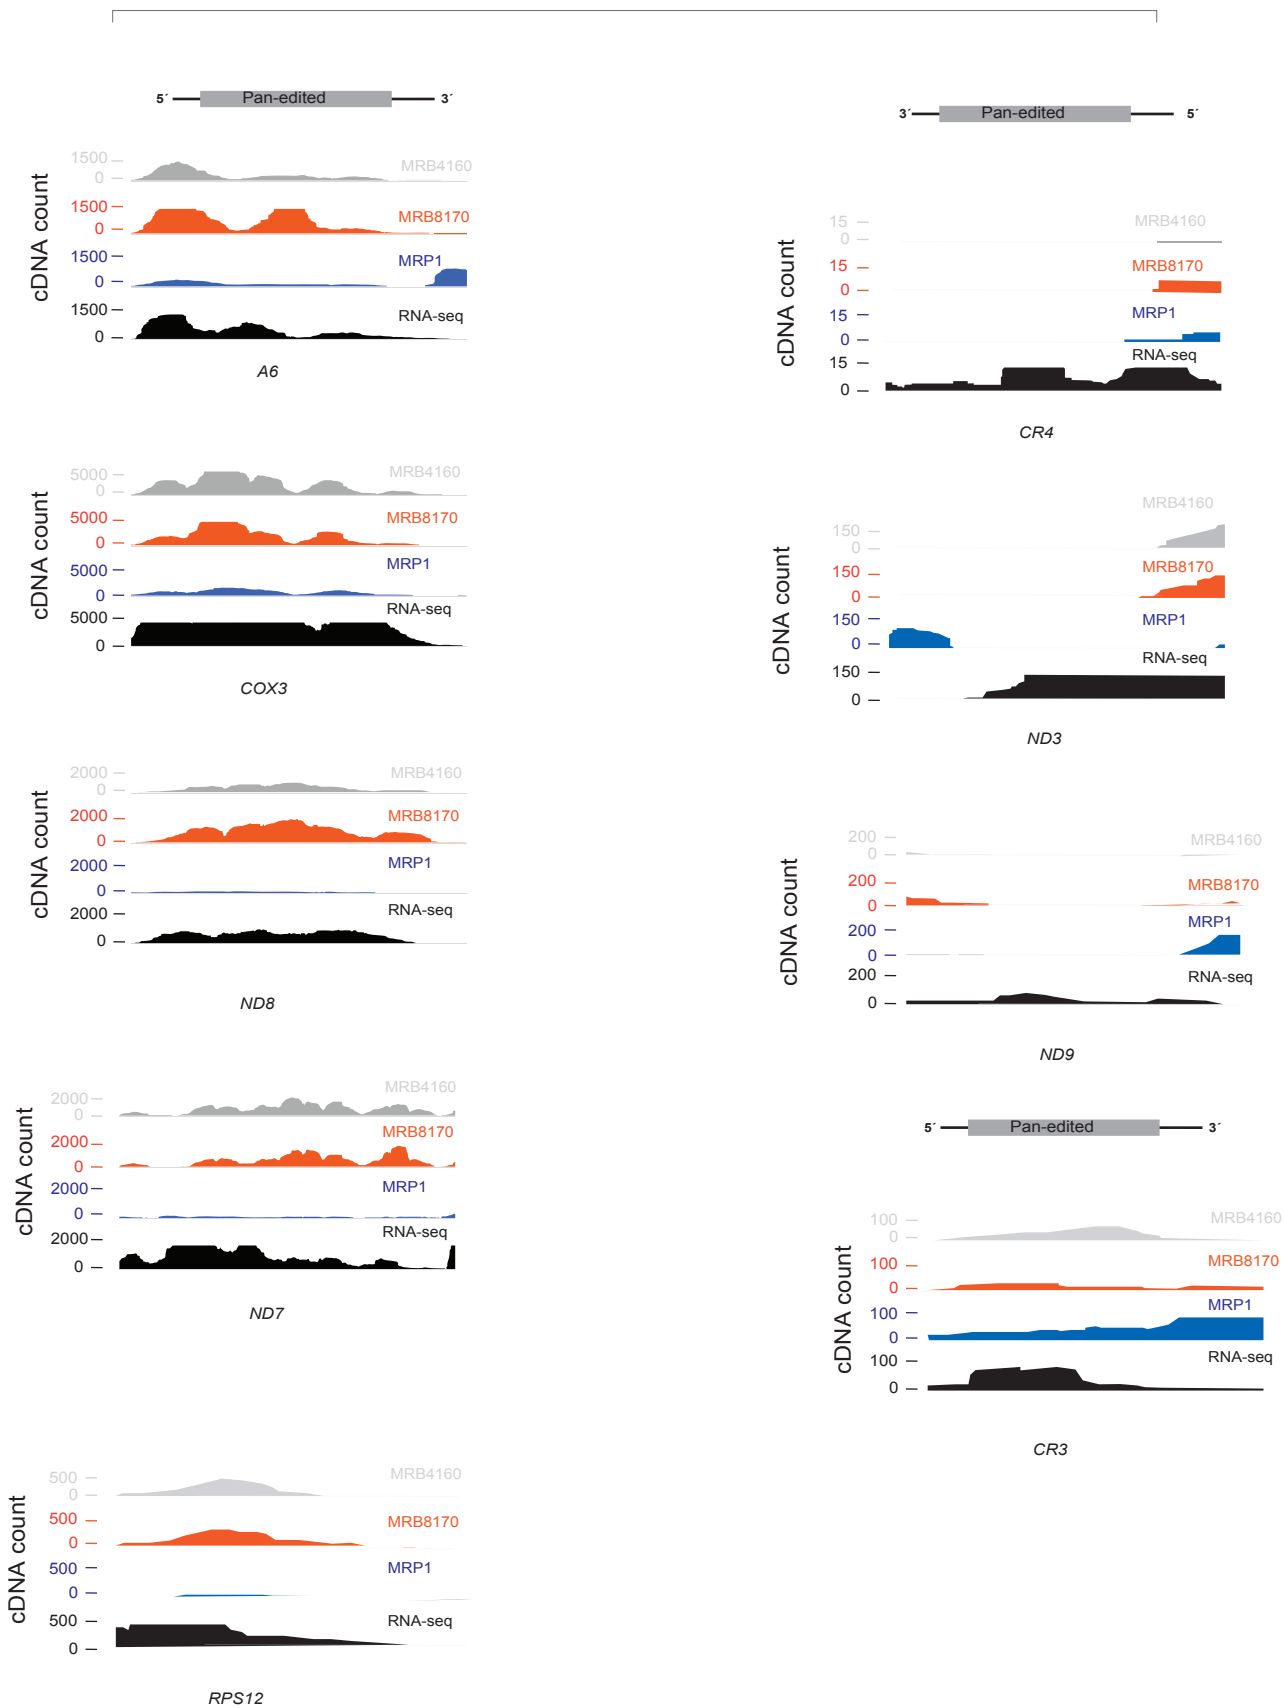

Figure S3.

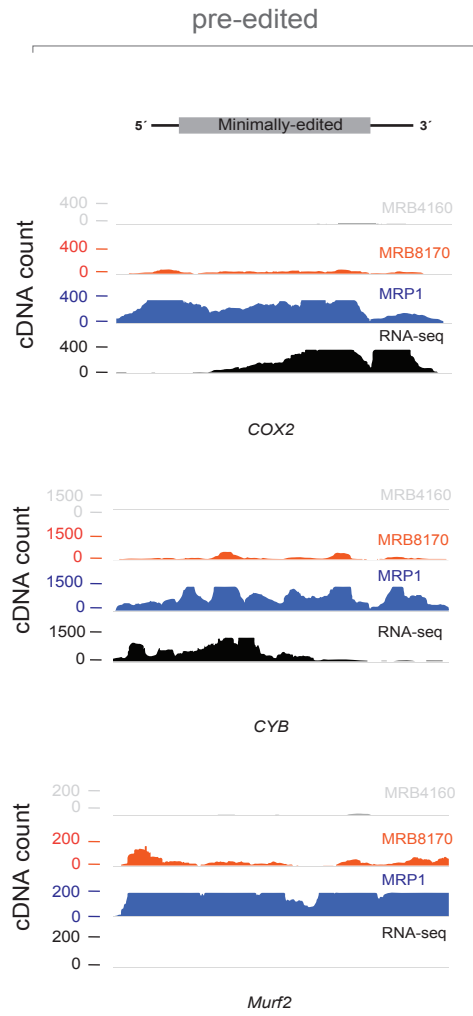

**Figure S4.**

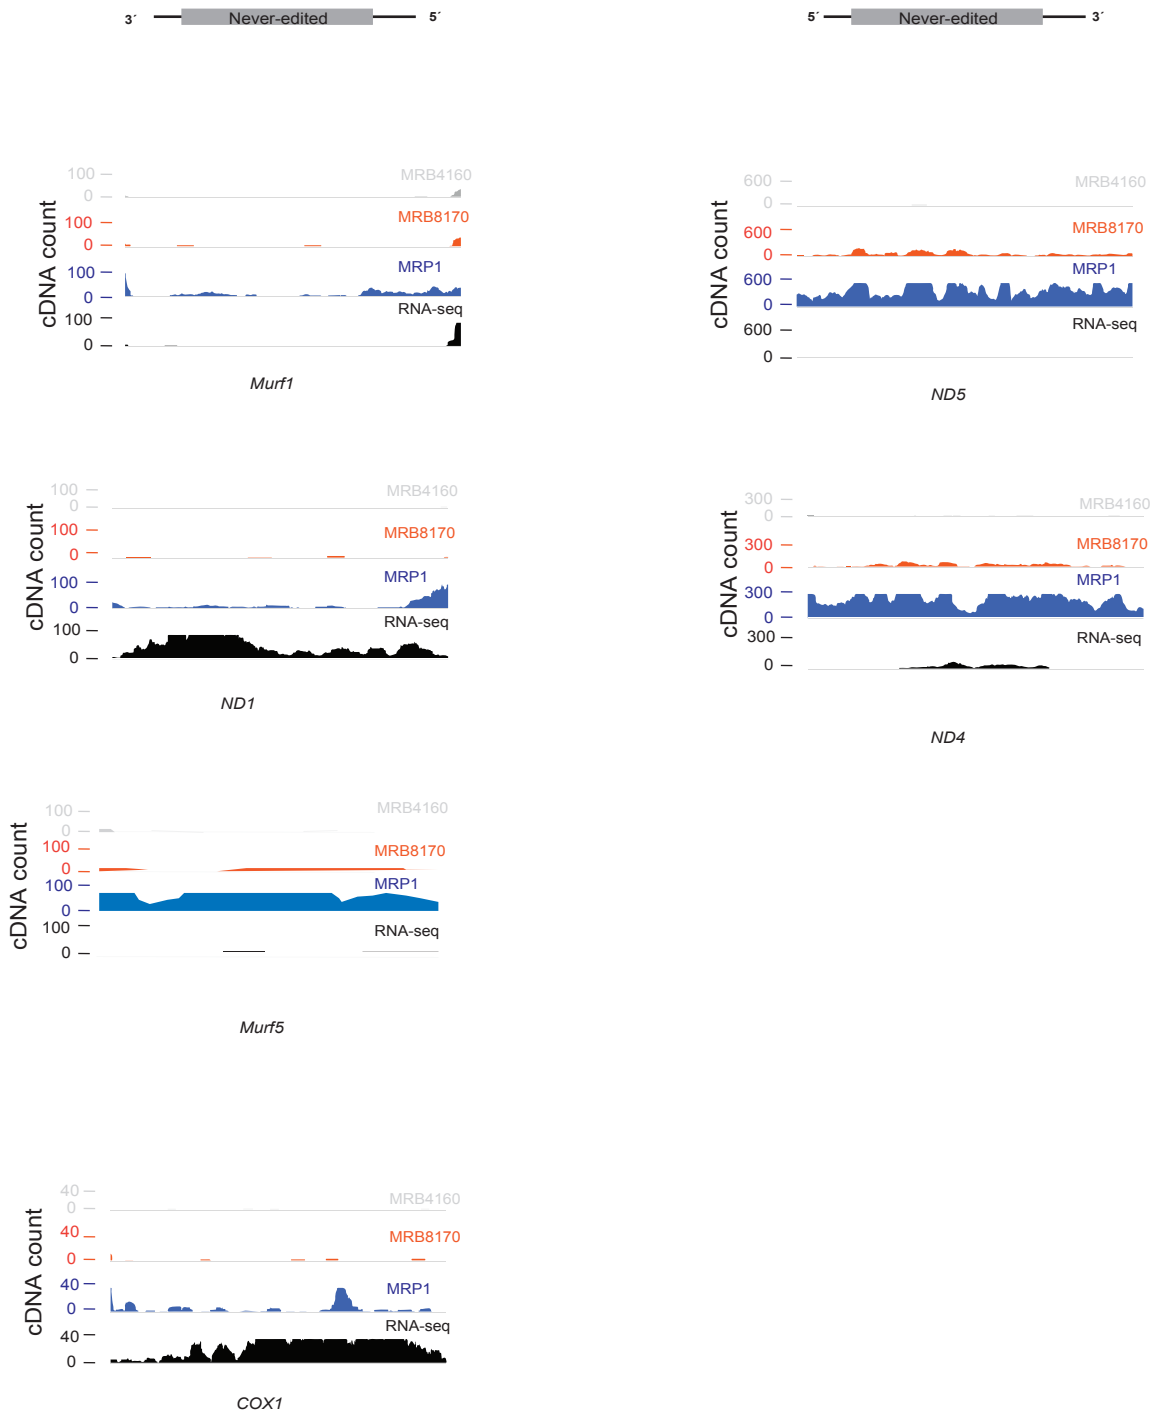

**Figure S5.**

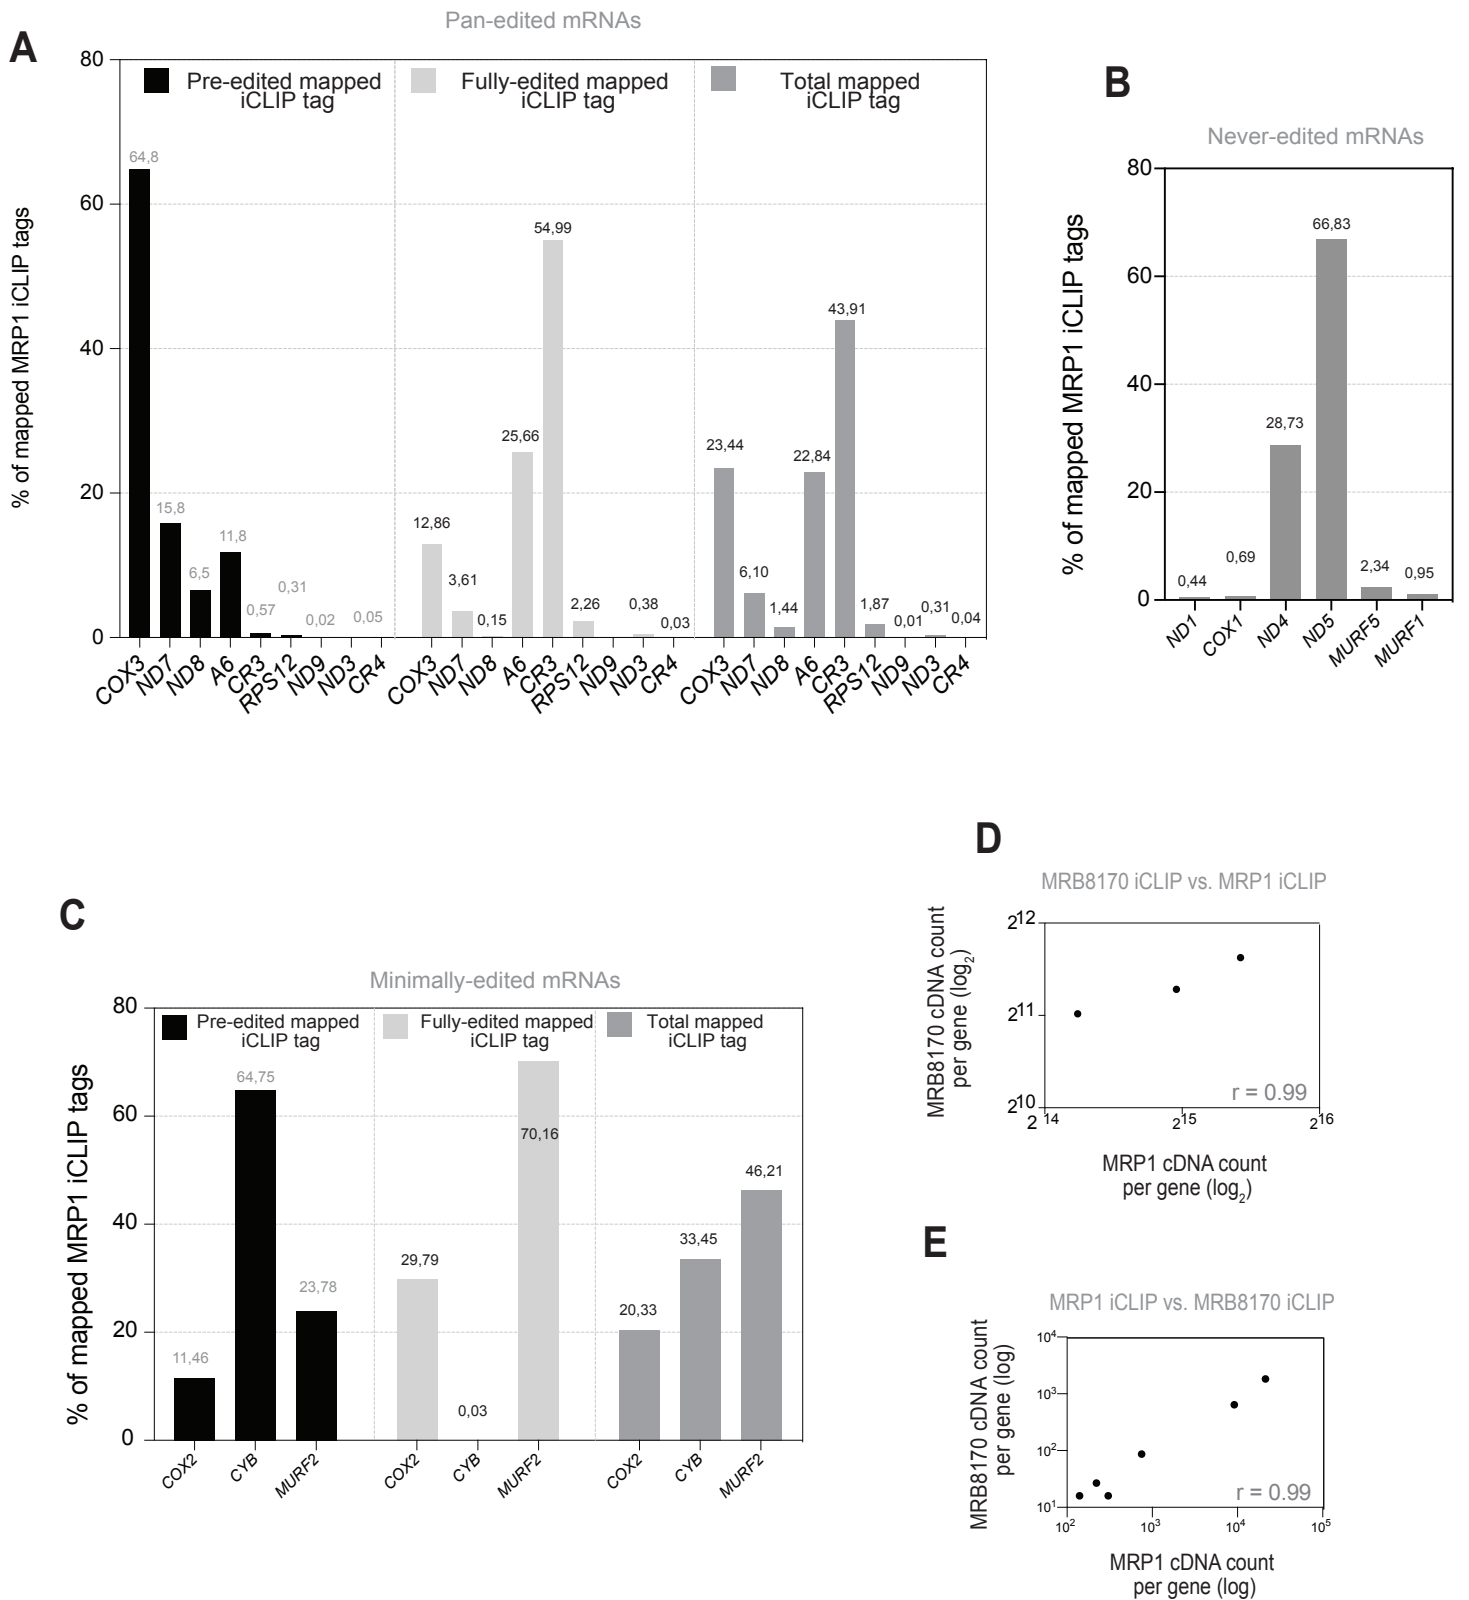

**Figure S6.**

Supplement: supp_066233.118_Supplemental_Figures.pdf [file supp_066233.118_Supplemental_Figures.pdf]
